# Supplementary material
Source: ML conference proceedings conference paper supplement (https://proceedings.neurips.cc/paper_files/paper/2018/hash/4e62e752ae53fb6a6eebd0f6146aa702-Abstract.html)
Supplement: Supplementary file [file 4e62e752ae53fb6a6eebd0f6146aa702-Supplemental.zip]

## A A Brief Review of Popular Optimization Algorithms

### A.1 Vanilla Gradient Descent Algorithm

A vanilla gradient descent (VGD) algorithm starts from an arbitrary initial solution  $x^{(0)}$ . At the  $k$ -th iteration ( $k > 0$ ), VGD takes

$$x^{(k)} = x^{(k-1)} - \eta \nabla f(x^{(k-1)}),$$

where  $\eta$  is a properly chosen step size. Since VGD only needs to calculate a gradient of  $f$  in each iteration, the computational cost per iteration is usually linearly dependent on  $d$ . For a  $L$ -smooth  $f$ , we can choose a constant step size such that  $\eta \leq \frac{1}{L}$  to guarantee convergence.

VGD has been extensively studied in existing literature. [11] show that:

- (1) For general convex function, VGD attains a sublinear convergence rate as

$$f(x^{(k)}) - f(x^*) \leq \frac{L\|x^{(0)} - x^*\|^2}{2k} \quad \text{for } k = 1, 2, \dots \quad (\text{A.1})$$

Note that (A.1) is also referred as an iteration complexity of  $\mathcal{O}(L/\epsilon)$ , i.e., we need  $\mathcal{O}(L/\epsilon)$  such that  $f(x^{(k)}) - f(x^*) \leq \epsilon$ , where  $\epsilon$  is a pre-specified accuracy of the objective value.

- (2) For a  $L$ -smooth and  $\mu$ -strongly convex  $f$ , VGD attains a linear convergence rate as

$$f(x^{(k)}) - f(x^*) \leq \left(1 - \frac{1}{\kappa}\right)^k \frac{L\|x^{(0)} - x^*\|^2}{2} \quad \text{for } k = 1, 2, \dots \quad (\text{A.2})$$

Note that (A.2) is also referred as an iteration complexity of  $\mathcal{O}(\kappa \cdot \log(1/\epsilon))$ .

### A.2 Nesterov's Accelerated Gradient Algorithms

The Nesterov's accelerated gradient (NAG) algorithms combines the vanilla gradient descent algorithm with an additional momentum at each iteration. Such a modification, though simple, enables NAG to attain better convergence rate than VGD. Specifically, NAG starts from an arbitrary initial solution  $x^{(0)}$  along with an auxiliary solution  $y^{(0)} = x^{(0)}$ . At the  $k$ -th iteration, NAG takes

$$x^{(k)} = y^{(k-1)} - \eta \nabla f(y^{(k-1)}) \quad \text{and} \quad y^{(k)} = x^{(k)} + \alpha(x^{(k)} - x^{(k-1)}),$$

where  $\alpha = \frac{k-1}{k+2}$  for general convex  $f$  and  $\alpha = \frac{\sqrt{\kappa}-1}{\sqrt{\kappa}+1}$  for strongly convex  $f$ . Intuitively speaking, NAG takes an affine combination of the current and previous solutions to compute the update for the two subsequent iterations. This can be viewed as the momentum of a particle during its movement. Similar to VGD, NAG only needs to calculate a gradient of  $f$  in each iteration. Similar to VGD, we can choose  $\eta \leq \frac{1}{L}$  for a  $L$ -smooth  $f$  to guarantee convergence.

NAG has also been extensively studied in existing literature. [11] show that:

- (1) For general convex function, NAG attains a sublinear convergence rate as

$$f(x^{(k)}) - f(x^*) \leq \frac{2L\|x^{(0)} - x^*\|^2}{k^2} \quad \text{for } k = 1, 2, \dots \quad (\text{A.3})$$

Note that (A.3) is also referred as an iteration complexity of  $\mathcal{O}(\sqrt{L}/\epsilon)$ .

- (2) For a  $L$ -smooth and  $\mu$ -strongly convex  $f$ , NAG attains a linear convergence rate as

$$f(x^{(k)}) - f(x^*) \leq \left(1 - \sqrt{\frac{1}{4\kappa}}\right)^k \frac{L\|x^{(0)} - x^*\|^2}{2} \quad \text{for } k = 1, 2, \dots \quad (\text{A.4})$$

Note that (A.4) is also referred as an iteration complexity of  $\mathcal{O}(\sqrt{\kappa} \cdot \log(1/\epsilon))$ .

### A.3 Randomized Coordinate Gradient Descent Algorithm

A randomized coordinate gradient descent (RCGD) algorithm is closely related to VGD. RCGD starts from an arbitrary initial solution  $x^{(0)}$ . Different from VGD, RCGD takes a gradient descent step only over a coordinate. Specifically, at the  $k$ -th iteration ( $k > 0$ ), RCGD randomly selects a coordinate  $j$  from  $1, \dots, d$ , and takes

$$x_j^{(k)} = x_j^{(k-1)} - \eta \nabla_j f(x^{(k-1)}) \quad \text{and} \quad x_{\setminus j}^{(k)} = x_{\setminus j}^{(k-1)}.$$

where  $\eta$  is a properly chosen step size. Since RCGD only needs to calculate a coordinate gradient of  $f$  in each iteration, the computational cost per iteration usually does not scale with  $d$ . For a  $L_{\max}$ -coordinate-smooth  $f$ , we can choose a constant step size such that  $\eta \leq \frac{1}{L_{\max}}$  to guarantee convergence.

RCGD has been extensively studied in existing literature. [10, 7] show that:

- (1) For general convex function, RCGD attains a sublinear convergence rate in terms of the expected objective value as

$$\mathbb{E}f(x^{(k)}) - f(x^*) \leq \frac{dL_{\max}\|x^{(0)} - x^*\|^2}{2k} \quad \text{for } k = 1, 2, \dots \quad (\text{A.5})$$

Note that (A.5) is also referred as an iteration complexity of  $\mathcal{O}(dL_{\max}/\epsilon)$ .

- (2) For a  $L_{\max}$ -smooth and  $\mu$ -strongly convex  $f$ , RCGD attains a linear convergence rate in terms of the expected objective value as

$$\mathbb{E}f(x^{(k)}) - f(x^*) \leq \left(1 - \frac{\mu}{dL_{\max}}\right)^k \frac{L\|x^{(0)} - x^*\|^2}{2} \quad \text{for } k = 1, 2, \dots \quad (\text{A.6})$$

Note that (A.6) is also referred as an iteration complexity of  $\mathcal{O}(dL_{\max}/\mu \cdot \log(1/\epsilon))$ .

#### A.4 Accelerated Randomized Coordinate Gradient Algorithms

Similar to NAG, the accelerated randomized coordinate gradient (ARCG) algorithms combine the randomized coordinate gradient descent algorithm with an additional momentum at each iteration. Such a modification also enables ARCG to attain better convergence rate than RCGD. Specifically, ARCG starts from an arbitrary initial solution  $x^{(0)}$  along with an auxiliary solution  $y^{(0)} = x^{(0)}$ . At the  $k$ -th iteration ( $k > 0$ ), ARCG randomly selects a coordinate  $j$  from  $1, \dots, d$ , and takes

$$x_j^{(k)} = y_j^{(k-1)} - \eta \nabla_j f(y^{(k-1)}), \quad x_{\setminus j}^{(k)} = y_{\setminus j}^{(k-1)}, \quad \text{and} \quad y^{(k)} = x^{(k)} + \alpha (x^{(k)} - x^{(k-1)}).$$

Here  $\alpha = \frac{\sqrt{\kappa_{\max}} - 1}{\sqrt{\kappa_{\max}} + 1}$  when  $f$  is strongly convex, and  $\alpha = \frac{k-1}{k+2}$  when  $f$  is general convex. Similar to RCGD, we can choose  $\eta \leq \frac{1}{L_{\max}}$  for a  $L_{\max}$ -coordinate-smooth  $f$  to guarantee convergence.

ARCG has been studied in existing literature. [5, 2] show that:

- (1) For general convex function, ARCG attains a sublinear convergence rate in terms of the expected objective value as

$$\mathbb{E}f(x^{(k)}) - f(x^*) \leq \frac{2d\sqrt{L_{\max}}\|x^{(0)} - x^*\|^2}{k^2} \quad \text{for } k = 1, 2, \dots \quad (\text{A.7})$$

Note that (A.7) is also referred as an iteration complexity of  $\mathcal{O}(d\sqrt{L_{\max}}/\sqrt{\epsilon})$ .

- (2) For a  $L_{\max}$ -smooth and  $\mu$ -strongly convex  $f$ , ARCG attains a linear convergence rate in terms of the expected objective value as

$$\mathbb{E}f(x^{(k)}) - f(x^*) \leq \left(1 - \frac{1}{d} \sqrt{\frac{\mu}{L_{\max}}}\right)^k \frac{L\|x^{(0)} - x^*\|^2}{2} \quad \text{for } k = 1, 2, \dots \quad (\text{A.8})$$

Note that (A.8) is also referred as an iteration complexity of  $\mathcal{O}(d\sqrt{L_{\max}}/\mu \cdot \log(1/\epsilon))$ .

#### A.5 Newton's Algorithm

The Newton's (Newton) algorithm requires  $f$  to be twice differentiable. It starts with an arbitrary initial  $x^{(0)}$ . At the  $k$ -th iteration ( $k > 0$ ), Newton takes

$$x^{(k)} = x^{(k-1)} - \eta (\nabla^2 f(x^{(k-1)}))^{-1} \nabla f(x^{(k-1)}).$$

The inverse of the Hessian matrix adjusts the descent direction by the landscape at  $x^{(k-1)}$ . Therefore, Newton often leads to a steeper descent than VGD and NAG in each iteration, especially for highly ill-conditioned problems.

Newton has been extensively studied in existing literature with an additional self-concordant assumption as follows:

**Assumption A.1** . Suppose that  $f$  is smooth and convex. We define  $g(t) = f(x + tv)$ . We say that  $f$  is self-concordant, if for any  $x \in \mathbb{R}^d$ ,  $v \in \mathbb{R}^d$ , and  $t \in \mathbb{R}$ , there exists a constant  $\nu$ , which is

independent on  $f$  such that we have

$$|g'''(t)| \leq \nu g''(t)^{3/2}.$$

[12] show that for a  $L$ -smooth,  $\mu$ -strongly convex and  $\nu$ -self-concordant,  $f$ , Newton attains a local quadratic convergence in conjunction. Specifically, given a suitable initial solution  $x^{(0)}$  satisfying  $\|x^{(0)} - x^*\|_2 \leq \zeta$ , where  $\zeta < 1$  is a constant depending on  $L$ ,  $\mu$ , and  $\nu$ , there exists a constant  $\xi$  depending only on  $\nu$  such that we have

$$f(x_{k+1}) - f(x^*) \leq \xi [f(x^{(k)}) - f(x^*)]^2 \quad \text{for } k = 1, 2, \dots \quad (\text{A.9})$$

Note that (A.9) is also referred as an iteration complexity of  $\tilde{\mathcal{O}}(\log \log(1/\epsilon))$ , where  $\tilde{\mathcal{O}}$  hides the constant term depending on  $L$ ,  $\mu$ , and  $\nu$ . Since Newton needs to calculate the inverse of the Hessian matrix, its per iteration computation cost is at least  $\mathcal{O}(d^3)$ . Thus, it outperforms VGD and NAG when we need a highly accurate solution, i.e.,  $\epsilon$  is very small.

## B Extension to Nonsmooth Composite Optimization

Our framework can also be extended to nonsmooth composite optimization in a similar manner to [16]. Let  $g$  be an  $L$ -smooth function, and  $h$  be a general convex function (not necessarily smooth). For  $x \in \mathbb{R}^d$ , the composite optimization problem solves

$$\min_{x \in \mathbb{R}^d} f(x) := g(x) + h(x).$$

Analogously to [16], we define the force field as the directional subgradient  $G(x, p)$  of function  $f$ , where  $G : \mathbb{R}^d \times \mathbb{R}^d \rightarrow \mathbb{R}^d$  is defined as  $G(x, p) \in \partial f(x)$  and  $\langle G(x, p), p \rangle = \sup_{\xi \in \partial f(x)} \langle \xi, p \rangle$ , where  $\partial f(x)$  denotes the sub-differential of  $f$ . The existence of  $G(x, p)$  is guaranteed by [15]. Accordingly, a new ODE describing the dynamics of the system is

$$m\ddot{X} + c\dot{X} + G(X, \dot{X}) = 0.$$

Under the assumption that the solution to the ODE exists and is unique, we illustrate the analysis by VGD (the mass  $m = 0$ ) under the proximal-PŁ condition. The extensions to other algorithms are straightforward. Specifically, a convex function  $f$  satisfies  $\mu$ -proximal-PŁ if

$$\frac{1}{2\mu} \inf_{p \in S^{d-1}} \|G(x, p)\|^2 \geq f(x) - f(x^*), \quad (\text{B.1})$$

where  $x^* = 0$  is the global minimum point of  $f$ . Slightly different from the definition of the proximal-PŁ condition in [4] involving a step size parameter, (B.1) does not involve any additional parameter. This is actually a more intuitive definition by choosing an appropriate subgradient. Let  $\gamma(t) = e^{2\mu t/c}$  and  $\Gamma(t) = 0$ . For a small enough  $\Delta t > 0$ , we study

$$\frac{\gamma(t + \Delta t)f(t + \Delta t) - \gamma(t)f(t)}{\Delta t}.$$

By Taylor expansions and the local Lipschitz property of convex function  $f$ , we have

$$\gamma(t + \Delta t) = \exp\left(\frac{2\mu t}{c}\right) \left(1 + \frac{2\mu}{c} \Delta t\right) + o(\Delta t) \text{ and}$$

$$f(X(t + \Delta t)) = f(X) + \langle \dot{X}, G(X, \dot{X}) \rangle \Delta t + o(\Delta t).$$

Combining the above two expansions, we obtain

$$\gamma(t + \Delta t)f(X(t + \Delta t)) = \exp\left(\frac{2\mu t}{c}\right) \left(f(X) + \frac{2\mu}{c} f(X) \Delta t + \langle \dot{X}, G(X, \dot{X}) \rangle \Delta t\right) + o(\Delta t).$$

This further implies

$$\frac{\gamma(t + \Delta t)f(t + \Delta t) - \gamma(t)f(t)}{\Delta t} = \exp\left(\frac{2\mu t}{c}\right) \left(\frac{2\mu}{c} f(X) - \frac{1}{c} \|G(X, \dot{X})\|^2\right) + O(\Delta t).$$

By the  $\mu$ -proximal-PŁ condition of  $f$ , we have  $\lim_{\Delta t \rightarrow 0} \frac{\gamma(t + \Delta t)f(t + \Delta t) - \gamma(t)f(t)}{\Delta t} \leq 0$ . The rest of the analysis follows exactly the same as it does in Section 3.1.2.
